# Supplementary material for: Changes in Platelet Counts and Thrombocytopenia Risk in Patients with Chronic Liver Disease with Different Etiologies Using Real-World Japanese Data
Source: Springer Nature journal article supplement (doi:10.1007/s12325-021-02008-x), 2021-12-20
Supplement: MOESM1 [file 19969600]

## **Supplementary Material**

# **Changes in Platelet Counts and Thrombocytopenia Risk in Patients with Chronic Liver Disease with Different Etiologies Using Real-World Japanese Data**

## **Authors**

Manami Yoshida<sup>1,2</sup>, Ryosuke Tateishi<sup>3</sup>, Shinzo Hiroi<sup>1</sup>, Masakazu Fujiwara<sup>4</sup>, Yoshitake Kitanishi<sup>4</sup>, Kosuke Iwasaki<sup>5</sup>, Tomomi Takeshima<sup>5</sup>, Ataru Igarashi<sup>2,6</sup>

## **Corresponding author**

Manami Yoshida

Medical Affairs, Shionogi & Co., Ltd. 7F, Tekko Building, 1-8-2, Marunouchi, Chiyoda-ku,  
Tokyo 100-0005, Japan

E-mail: [manami.yoshida@shionogi.co.jp](mailto:manami.yoshida@shionogi.co.jp)

**Supplementary Table S1** Definitions of chronic liver disease by disease name

| Disease Name*                        | Disease Code | Category           |
|--------------------------------------|--------------|--------------------|
| Chronic hepatitis B                  | 0703003      | Hepatitis B        |
| Type B cirrhosis                     | 8843999      | Hepatitis B        |
| Type B compensated cirrhosis         | 8848181      | Hepatitis B        |
| Type B decompensated liver cirrhosis | 8848182      | Hepatitis B        |
| Hepatitis C                          | 0703022      | Hepatitis C        |
| Chronic hepatitis C                  | 0703025      | Hepatitis C        |
| Type C cirrhosis                     | 8844002      | Hepatitis C        |
| Type C compensated cirrhosis         | 8848184      | Hepatitis C        |
| Type C decompensated liver cirrhosis | 8848185      | Hepatitis C        |
| Chronic viral hepatitis              | 8840305      | viral hepatitis    |
| Posttransfusion hepatitis            | 0703012      | viral hepatitis    |
| Viral hepatitis                      | 8830747      | viral hepatitis    |
| Autoimmune cirrhosis                 | 8846291      | autoimmune         |
| Autoimmune hepatitis                 | 5733008      | autoimmune         |
| Lipoidal hepatitis                   | 8840981      | autoimmune         |
| Severe autoimmune hepatitis          | 8848268      | autoimmune         |
| Chronic drug-induced liver failure   | 8840404      | Toxin/drug-induced |
| Chronic drug-induced hepatitis       | 8846060      | Toxin/drug-induced |
| Addictive hepatitis                  | 5733011      | Toxin/drug-induced |

Table S1 (cont'd)

| Disease Name*                                                           | Disease Code | Category           |
|-------------------------------------------------------------------------|--------------|--------------------|
| Drug-induced hepatitis                                                  | 5733014      | Toxin/drug-induced |
| Drug-induced cirrhosis                                                  | 8849218      | Toxin/drug-induced |
| Alcoholic hepatitis                                                     | 8830333      | alcoholic          |
| Alcoholic liver fibrosis                                                | 8846239      | alcoholic          |
| Alcoholic cirrhosis                                                     | 5712001      | alcoholic          |
| Decompensated alcoholic cirrhosis                                       | 8846331      | alcoholic          |
| Esophageal varices associated with alcoholic liver cirrhosis            | 8846466      | alcoholic          |
| Esophageal varices hemorrhage associated with alcoholic liver cirrhosis | 8849244      | alcoholic          |
| Alcoholic liver failure                                                 | 8830335      | alcoholic          |
| Chronic alcoholic liver failure                                         | 8840298      | alcoholic          |
| Nonalcoholic steatohepatitis                                            | 8843497      | NASH               |
| Liver cancer                                                            | 1550004      | other              |
| Hepatocellular carcinoma                                                | 1550005      | other              |
| Primary liver cancer                                                    | 1550005      | other              |
| Hepatocellular carcinoma rupture                                        | 8847692      | other              |
| Chronic liver failure                                                   | 8840321      | other              |
| Hepatic coma                                                            | 5722002      | other              |
| Hepatic encephalopathy                                                  | 5722003      | other              |
| Hepatocellular jaundice                                                 | 5738005      | other              |
| Liver failure                                                           | 5738014      | other              |
| Liver atrophy                                                           | 8831477      | other              |
| Liver necrosis                                                          | 8831481      | other              |

Table S1 (cont'd)

| Disease Name*                     | Disease Code | Category |
|-----------------------------------|--------------|----------|
| Chronic persistent hepatitis      | 8840360      | other    |
| Active chronic hepatitis          | 5714010      | other    |
| Chronic inactive hepatitis        | 5714007      | other    |
| Chronic hepatitis                 | 5714005      | other    |
| Chronic hepatitis exacerbation    | 5714006      | other    |
| Persistent hepatitis              | 5733010      | other    |
| Liver fibrosis                    | 8831607      | other    |
| Liver sclerosis                   | 8831511      | other    |
| Secondary biliary cirrhosis       | 5716003      | other    |
| Obstructive cirrhosis             | 5716004      | other    |
| Biliary cirrhosis                 | 5716002      | other    |
| Gallbladder liver cirrhosis       | 8837113      | other    |
| Decompensated cirrhosis           | 5715012      | other    |
| Portal cirrhosis                  | 5715013      | other    |
| Compensated cirrhosis             | 5715025      | other    |
| Postnecrotic liver cirrhosis      | 5715027      | other    |
| Atrophic cirrhosis                | 8830442      | other    |
| Nutritional cirrhosis             | 8830819      | other    |
| Hepatic cirrhosis after hepatitis | 8831482      | other    |
| Liver cirrhosis                   | 8831512      | other    |
| Nodular cirrhosis                 | 8833121      | other    |
| Mixed-type cirrhosis              | 8833880      | other    |
| Nodular cirrhosis                 | 8834697      | other    |
| Major nodular cirrhosis           | 8837269      | other    |

Table S1 (cont'd)

| Disease Name*                                                 | Disease Code | Category |
|---------------------------------------------------------------|--------------|----------|
| Septal cirrhosis                                              | 8837557      | other    |
| Idiopathic cirrhosis                                          | 8838175      | other    |
| Periportal cirrhosis                                          | 8840692      | other    |
| Esophageal varices associated with liver cirrhosis            | 8846517      | other    |
| Esophageal varices hemorrhage associated with liver cirrhosis | 8849260      | other    |
| Nonspecific reactive hepatitis                                | 8839335      | other    |
| Granulomatous hepatitis                                       | 8838378      | other    |
| Cholestatic hepatitis                                         | 5718009      | other    |
| hepatitis                                                     | 5733005      | other    |
| Congestive hepatitis                                          | 8830795      | other    |
| Congestive liver cirrhosis                                    | 5715001      | other    |
| Portal vein dilatation                                        | 4598008      | other    |
| Idiopathic portal hypertension                                | 5723004      | other    |
| Cruveilhier–Baumgarten syndrome                               | 8832839      | other    |
| Portal hypertension                                           | 8840687      | other    |
| Portal hypertensive gastritis                                 | 8843101      | other    |
| Portal hypertensive gastroenteropathy                         | 8845506      | other    |
| Portal hypertensive enteropathy                               | 8845507      | other    |

\*Disease Name was written in Japanese in the original database.

**Supplementary Table S2** Mean platelet count in patients diagnosed as thrombocytopenia

| Disease Category                      | N   | Mean Platelet Count*<br>( $\times 10^9/L$ ) |
|---------------------------------------|-----|---------------------------------------------|
| Hepatitis B                           | 76  | 124.8                                       |
| Hepatitis C                           | 242 | 125.5                                       |
| Hepatitis B and C                     | 10  | 118.3                                       |
| Viral hepatitis (virus not specified) | 2   | 104.5                                       |
| Autoimmune hepatitis                  | 5   | 110.4                                       |
| Toxin/drug induced hepatitis          | 3   | 148.3                                       |
| Alcoholic hepatitis                   | 45  | 78.6                                        |
| NASH                                  | 7   | 79.6                                        |
| Other CLD                             | 113 | 99.1                                        |

\*Recorded on the day or closest day of thrombocytopenia diagnosis within 12 weeks prior to the diagnosis.
